# Supplementary material for: Describing Uncertainty in Salmonella Thermal Inactivation Using Bayesian Statistical Modeling
Source: Front Microbiol. 2019 Sep 25;10:2239. doi: 10.3389/fmicb.2019.02239 (PMC6798057; doi:10.3389/fmicb.2019.02239)
Supplement: Supplementary file 1 [file Data_Sheet_1.ZIP]

Archive with 68 entries (57 files):
- bayesian_modeling/
- bayesian_modeling/02_input/
- bayesian_modeling/02_input/Combase_data_set.csv
- __MACOSX/
- __MACOSX/bayesian_modeling/
- __MACOSX/bayesian_modeling/02_input/
- __MACOSX/bayesian_modeling/02_input/._Combase_data_set.csv
- bayesian_modeling/02_input/.DS_Store
- __MACOSX/bayesian_modeling/02_input/._.DS_Store
- __MACOSX/bayesian_modeling/._02_input
- bayesian_modeling/.DS_Store
- __MACOSX/bayesian_modeling/._.DS_Store
- bayesian_modeling/04_output/
- bayesian_modeling/04_output/.DS_Store
- __MACOSX/bayesian_modeling/04_output/
- __MACOSX/bayesian_modeling/04_output/._.DS_Store
- bayesian_modeling/04_output/Fig.4.pdf
- __MACOSX/bayesian_modeling/04_output/._Fig.4.pdf
- bayesian_modeling/04_output/Fig.5.pdf
- __MACOSX/bayesian_modeling/04_output/._Fig.5.pdf
- bayesian_modeling/04_output/Fig.1.pdf
- __MACOSX/bayesian_modeling/04_output/._Fig.1.pdf
- bayesian_modeling/04_output/Fig.2.pdf
- __MACOSX/bayesian_modeling/04_output/._Fig.2.pdf
- bayesian_modeling/04_output/Fig.3.pdf
- __MACOSX/bayesian_modeling/04_output/._Fig.3.pdf
- __MACOSX/bayesian_modeling/._04_output
- bayesian_modeling/Instructions.txt
- __MACOSX/bayesian_modeling/._Instructions.txt
- bayesian_modeling/01_script/
- bayesian_modeling/01_script/Fig.5.R
- __MACOSX/bayesian_modeling/01_script/
- __MACOSX/bayesian_modeling/01_script/._Fig.5.R
- bayesian_modeling/01_script/Fig.5(b).R
- __MACOSX/bayesian_modeling/01_script/._Fig.5(b).R
- bayesian_modeling/01_script/Fig.1.R
- __MACOSX/bayesian_modeling/01_script/._Fig.1.R
- bayesian_modeling/01_script/.DS_Store
- __MACOSX/bayesian_modeling/01_script/._.DS_Store
- bayesian_modeling/01_script/automatic.R
- __MACOSX/bayesian_modeling/01_script/._automatic.R
- bayesian_modeling/01_script/Fig.2.R
- __MACOSX/bayesian_modeling/01_script/._Fig.2.R
- bayesian_modeling/01_script/Fig.3.R
- __MACOSX/bayesian_modeling/01_script/._Fig.3.R
- bayesian_modeling/01_script/run_Bayesian.R
- __MACOSX/bayesian_modeling/01_script/._run_Bayesian.R
- bayesian_modeling/01_script/.Rapp.history
- __MACOSX/bayesian_modeling/01_script/._.Rapp.history
- bayesian_modeling/01_script/Fig.4.R
- __MACOSX/bayesian_modeling/01_script/._Fig.4.R
- bayesian_modeling/01_script/run_2step_Bayesian.R
- __MACOSX/bayesian_modeling/01_script/._run_2step_Bayesian.R
- bayesian_modeling/01_script/Fig.5(a).R
- __MACOSX/bayesian_modeling/01_script/._Fig.5(a).R
- __MACOSX/bayesian_modeling/._01_script
- bayesian_modeling/03_model/
- bayesian_modeling/03_model/.DS_Store
- __MACOSX/bayesian_modeling/03_model/
- __MACOSX/bayesian_modeling/03_model/._.DS_Store
- bayesian_modeling/03_model/model_Bayesian.stan
- __MACOSX/bayesian_modeling/03_model/._model_Bayesian.stan
- bayesian_modeling/03_model/model_2step_Bayesian.stan
- __MACOSX/bayesian_modeling/03_model/._model_2step_Bayesian.stan
- __MACOSX/bayesian_modeling/._03_model
- bayesian_modeling/.Rapp.history
- __MACOSX/bayesian_modeling/._.Rapp.history
- __MACOSX/._bayesian_modeling
