# Supplementary material for: Describing Uncertainty in Salmonella Thermal Inactivation Using Bayesian Statistical Modeling
Source: Front Microbiol. 2019 Sep 25;10:2239. doi: 10.3389/fmicb.2019.02239 (PMC6798057; doi:10.3389/fmicb.2019.02239)
Supplement: Supplementary file 1 [file Data_Sheet_1.ZIP › bayesian_modeling/01_script/automatic.R]

source("01_script/run_Bayesian.R")
source("01_script/run_2step_Bayesian.R")
source("01_script/Fig.1.R")
source("01_script/Fig.2.R")
source("01_script/Fig.3.R")
source("01_script/Fig.4.R")
source("01_script/Fig.5.R")
