# Supplementary material for: Describing Uncertainty in Salmonella Thermal Inactivation Using Bayesian Statistical Modeling
Source: Front Microbiol. 2019 Sep 25;10:2239. doi: 10.3389/fmicb.2019.02239 (PMC6798057; doi:10.3389/fmicb.2019.02239)
Supplement: Supplementary file 1 [file Data_Sheet_1.ZIP › bayesian_modeling/01_script/Fig.5.R]

library("ggplot2")
library("gridExtra")
source("01_script/Fig.5(a).R")
source("01_script/Fig.5(b).R")
ggsave(file='04_output/Fig.5.pdf', plot=grid.arrange(p,p2, nrow = 2),  w=2.8, h=4)
