# Supplementary material for: Describing Uncertainty in Salmonella Thermal Inactivation Using Bayesian Statistical Modeling
Source: Front Microbiol. 2019 Sep 25;10:2239. doi: 10.3389/fmicb.2019.02239 (PMC6798057; doi:10.3389/fmicb.2019.02239)
Supplement: Supplementary file 1 [file Data_Sheet_1.ZIP › bayesian_modeling/02_input/Combase_data_set.csv]

TIME	N_T	TE
0	6.36	80
0.00556	4.52	80
0.0111	3.18	80
0.0167	2.26	80
0	6.36	80
0.00556	4.52	80
0.0111	3.18	80
0.0167	2.26	80
0	6.86	80
0.00556	2.71	80
0	6.76	80
0.00556	3.48	80
0	6.8	78
0.00556	3.19	78
0.0111	1.9	78
0	6.63	78
0.00556	4.45	78
0.0111	3.58	78
0.0167	2.61	78
0	6.52	78
0.00556	4.98	78
0.0111	3.76	78
0.0167	3.11	78
0.0222	1.78	78
0.0278	1.6	78
0	6.52	78
0.00556	5.11	78
0.0111	4.04	78
0.0167	3.38	78
0.0222	2.6	78
0.0278	2	78
0.0333	1.78	78
0	6.52	76
0.00556	4.3	76
0.0111	4.26	76
0.0167	3.9	76
0.0222	3.18	76
0.0278	2.9	76
0.0333	2.15	76
0.0389	1.6	76
0	6.36	76
0.00556	5.81	76
0.0111	4.68	76
0.0167	3.8	76
0.0222	3.36	76
0.0278	2.68	76
0.0333	2.38	76
0	6.6	76
0.00556	5.6	76
0.0111	4.78	76
0.0167	3.98	76
0.0222	3.3	76
0.0278	3.03	76
0.0333	2.3	76
0.0389	1.9	76
0	6.54	74
0.00556	6.11	74
0.0111	5.4	74
0.0167	4.85	74
0.0222	4.26	74
0.0278	3.72	74
0.0333	3.68	74
0.0389	3.45	74
0.0444	2.58	74
0.05	1.6	74
0	6.52	74
0.00556	5.81	74
0.0111	5.18	74
0.0167	4.68	74
0.0222	3.99	74
0.0278	3.74	74
0.0333	3.58	74
0.0389	2.68	74
0.0444	1.9	74
0	6.26	74
0.00556	6.18	74
0.0111	5.48	74
0.0167	4.88	74
0.0222	4.7	74
0.0278	4.26	74
0.0333	4.15	74
0.0389	3.4	74
0.0444	2.57	74
0.05	2.15	74
0	6.72	72
0.00833	5.89	72
0.0167	4.9	72
0.025	4.11	72
0.0333	3.65	72
0.0417	3.1	72
0.05	2.99	72
0.0583	2.6	72
0.0667	1.78	72
0.075	1.9	72
0	6.86	72
0.00833	5.95	72
0.0167	5.58	72
0.025	4.92	72
0.0333	4.48	72
0.0417	4.18	72
0.05	3.86	72
0.0583	3.56	72
0.0667	3.15	72
0.075	2.34	72
0	6.76	72
0.00833	5.89	72
0.0167	5.52	72
0.025	4.74	72
0.0333	3.95	72
0.0417	3.2	72
0.05	2.95	72
0.0583	2.9	72
0.0667	2.3	72
0.075	2.78	72
0	6.76	72
0.00833	5.3	72
0.0167	4.63	72
0.025	3.8	72
0.0333	2.9	72
0.0417	2.66	72
0.05	2.08	72
0.0583	1.9	72
0.0667	1.6	72
0.075	1.6	72
0	6.54	70
0.0167	5.94	70
0.0333	5.45	70
0.05	4.45	70
0.0667	4.4	70
0.0833	3.78	70
0.1	3.63	70
0.117	3.36	70
0.133	2.94	70
0.15	2.45	70
0	6.52	70
0.0167	5.58	70
0.0333	4.97	70
0.05	4.08	70
0.0667	4	70
0.0833	3.45	70
0.1	3.06	70
0.117	2.78	70
0.133	2.2	70
0	6.7	70
0.0167	5.52	70
0.0333	4.45	70
0.05	3.7	70
0.0667	3.18	70
0.0833	2.75	70
0.1	2.72	70
0.117	2.51	70
0.133	2.34	70
0.15	1.78	70
0	6.63	65
0.0333	5.6	65
0.0667	4.76	65
0.1	4	65
0.133	3.97	65
0.167	3.78	65
0.2	2.7	65
0.233	2.38	65
0	6.74	65
0.0333	6.08	65
0.0667	5.45	65
0.1	5	65
0.133	4.65	65
0.167	4.45	65
0.2	4.04	65
0.233	3.74	65
0.267	3.76	65
0.3	2.78	65
0	6.52	65
0.0333	5.83	65
0.0667	5.68	65
0.1	5.3	65
0.133	4.68	65
0.167	4.36	65
0.2	4.26	65
0.233	3.85	65
0.267	3.15	65
0.3	2.9	65
0	6.3	65
0.0333	5.74	65
0.0667	5.3	65
0.1	4.58	65
0.133	4.45	65
0.167	3.85	65
0.2	3.58	65
0.233	2.89	65
0.267	2.6	65
0.3	2.15	65
0	6.26	60
0.117	5.26	60
0.233	4.65	60
0.35	3.76	60
0.467	3.3	60
0.583	2.81	60
0.7	2.51	60
0.817	2.34	60
0.933	2.3	60
1.05	2.2	60
0	6.36	60
0.117	5.95	60
0.233	5.26	60
0.35	4.63	60
0.467	4.58	60
0.583	4	60
0.7	3.93	60
0.817	3.76	60
0.933	3.04	60
1.05	2.82	60
0	6.6	60
0.117	5.04	60
0.233	4.11	60
0.35	3.98	60
0.467	3.54	60
0.583	3.48	60
0.7	3.02	60
0.817	2.83	60
0.933	2.76	60
1.05	1.6	60
0	6.76	60
0.117	5.4	60
0.233	4.8	60
0.35	4.3	60
0.467	4.3	60
0.583	3.98	60
0.7	3.8	60
0.817	3.72	60
0.933	3.12	60
1.05	2.38	60
0	6.94	55
0.167	5.76	55
0.333	5.15	55
0.5	4.74	55
0.667	4.18	55
0.833	4	55
1.33	3.08	55
1.5	3	55
0	6.65	55
0.167	5.85	55
0.333	5.52	55
0.5	5.45	55
0.667	5	55
0.833	4.74	55
1	4.65	55
1.17	4.18	55
1.33	4.26	55
1.5	4.04	55
0	6	55
0.167	6	55
0.333	5.45	55
0.5	4.88	55
0.667	4.65	55
0.833	4.4	55
1	4.45	55
1.17	4.18	55
1.33	3.72	55
1.5	3.58	55
