# Supplementary material for: Describing Uncertainty in Salmonella Thermal Inactivation Using Bayesian Statistical Modeling
Source: Front Microbiol. 2019 Sep 25;10:2239. doi: 10.3389/fmicb.2019.02239 (PMC6798057; doi:10.3389/fmicb.2019.02239)
Supplement: Supplementary file 1 [file Data_Sheet_1.ZIP › bayesian_modeling/03_model/model_2step_Bayesian.stan]

data {
  int N;
  real N_T[N];
}

parameters {
  real<lower=0> sigma;
  real<lower=0> kT;
}
model{
    N_T ~ lognormal(log(kT),sigma) ;
}
