# Supplementary material for: Describing Uncertainty in Salmonella Thermal Inactivation Using Bayesian Statistical Modeling
Source: Front Microbiol. 2019 Sep 25;10:2239. doi: 10.3389/fmicb.2019.02239 (PMC6798057; doi:10.3389/fmicb.2019.02239)
Supplement: Supplementary file 1 [file Data_Sheet_1.ZIP › bayesian_modeling/03_model/model_Bayesian.stan]

data{
	int N;
	vector[N] N_T;
	vector[N] TE;
}

parameters{
	real c;
	real <lower=0> b;
	real <lower=0> sigma;
}

model{	
	N_T ~ lognormal(log(b*exp(c*TE)),sigma);
}
