# Supplementary material for: Describing Uncertainty in Salmonella Thermal Inactivation Using Bayesian Statistical Modeling
Source: Front Microbiol. 2019 Sep 25;10:2239. doi: 10.3389/fmicb.2019.02239 (PMC6798057; doi:10.3389/fmicb.2019.02239)
Supplement: Supplementary file 1 [file Data_Sheet_1.ZIP › bayesian_modeling/Instructions.txt]

1. R and rstan environment is required for running our code.
   (https://www.r-project.org)
   (https://mc-stan.org/users/interfaces/rstan)
 
2. Set working directory to the downloaded file, 'bayesian_modeling'.
 
3. Bayesian modeling is calculated in 'run_Bayesian.R' and 'run_2step_Bayesian.R'.
 
4. The scripts named Fig.X enable to describe figures in the paper.
 
Our R scripts has been developed under R version 3.5.0 and rstan version 2.17.3.
